---

# Erratum

American Diabetes Association. Diabetes care in the school and day care setting (Position Statement). *Diabetes Care* 2012;35(Suppl. 1):S76–S80

In the print version of the article listed above, the link to a sample Diabetes Medical Management Plan (DMMP) form is incorrect. On page S77, the link should have been <http://professional.diabetes.org/DMMP>. The online version reflects these changes.
